# Supplementary material
Source: Springer Nature journal article supplement (https://www.springermedizin.de/resource/supplementary/12967_2013_1702_MOESM11_ESM.pdf/9575148)

Threshold cycles of EBV miRNAs during qPCR analysis of Malaysian sera

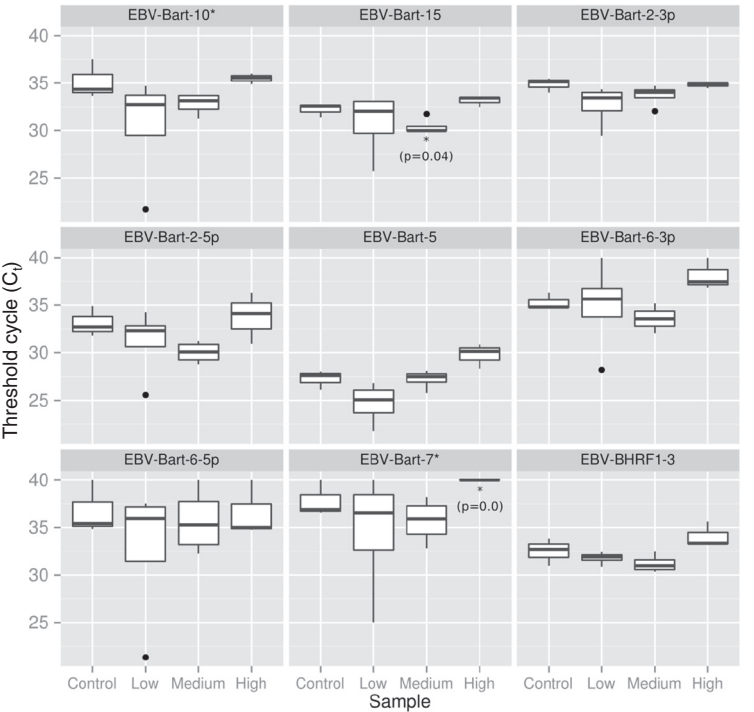

Supplement: MOESM11 [file 9575148]
